# Supplementary material
Source: PubMed Central journal article supplement (PMC1697797)

## Control siRNA

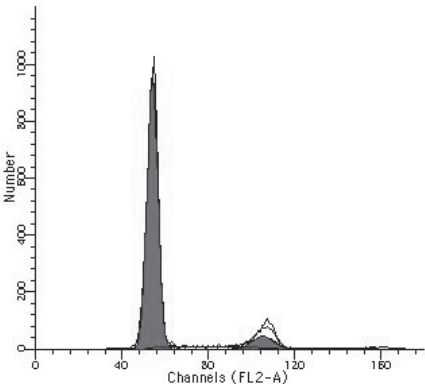

|       |                  |
|-------|------------------|
| G0/G1 | 85.50 +/- 0.50 % |
| G2/M  | 8.54 +/- 1.61 %  |
| S     | 6.00 +/- 1.30 %  |

## WTAP siRNA

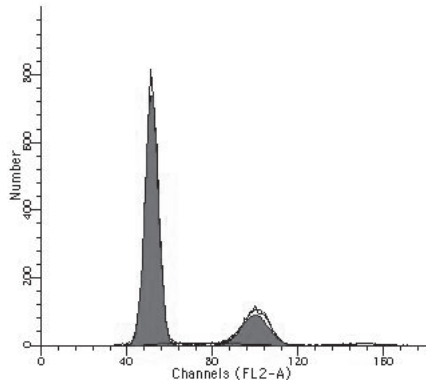

|       |                     |
|-------|---------------------|
| G0/G1 | 75.77 +/- 2.00 % ** |
| G2/M  | 20.67 +/- 1.79 % ** |
| S     | 3.84 +/- 0.75 %     |

Supplement: pnas_0608357103_1.pdf [file pnas_0608357103_1.pdf]
